# Supplementary material for: Non-adhesive contrast substrate for single-cell trapping and Raman spectroscopic analysis
Source: Royal Society of Chemistry journal article supplement (doi:10.1039/d2lc00665k), 2022-01-01
Supplement: d2lc00665k1.pdf [file d2lc00665k1.pdf]

## Electronic Supplementary Information.

### Non-adhesive contrast substrate for single-cell trapping and Raman spectroscopic analysis

*Alina Peethan,<sup>a</sup> Aravind M,<sup>a</sup> Santhosh Chidangil,<sup>a,b</sup> Sajan D. George<sup>\*a,c</sup>*

<sup>[a]</sup> Department of Atomic and Molecular Physics, Manipal Academy of Higher Education,  
Manipal, India – 576104

<sup>[b]</sup> Centre of Excellence for Biophotonics, Manipal Academy of Higher Education, Manipal,  
India – 576104

<sup>[c]</sup> Centre for Applied Nanosciences (CANs), Manipal Academy of Higher Education, Manipal,  
India – 576104

E-mail \*: [sajan.george@manipal.edu](mailto:sajan.george@manipal.edu)

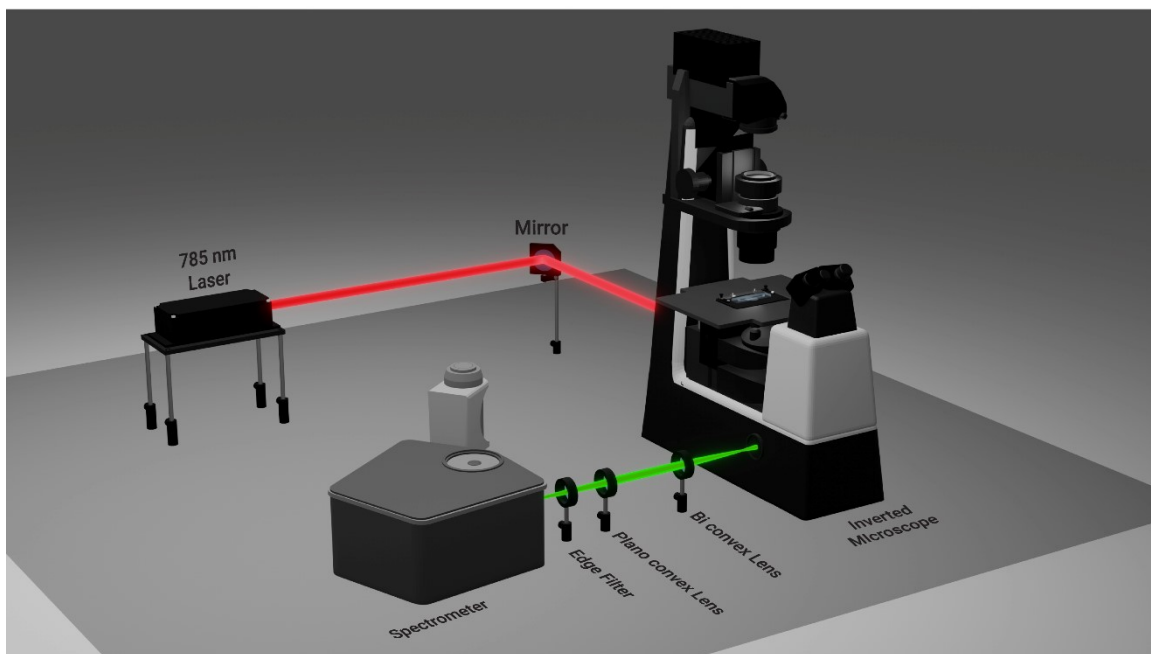

**Fig. S1.** Schematic of Raman setup

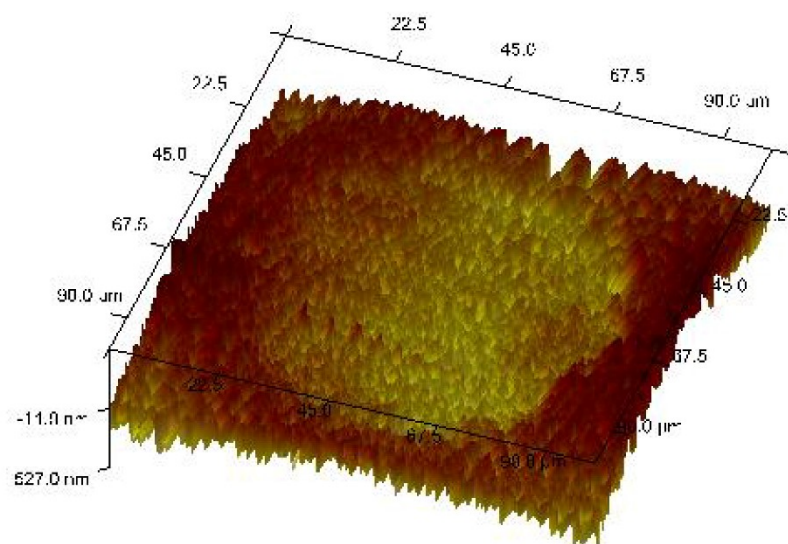

**Fig. S2.** AFM image of non-adhesive contrast surface created with laser power greater than 204 mW

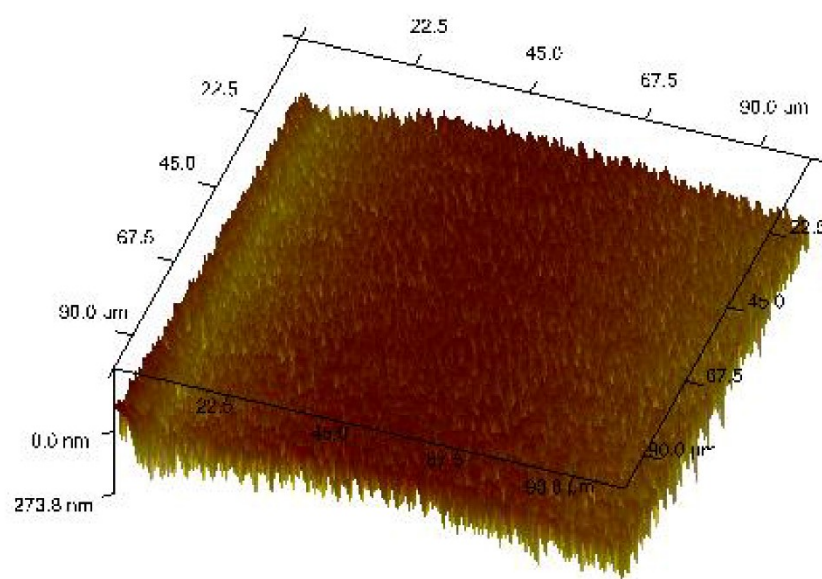

**Fig. S3.** AFM image of non-adhesive contrast surface created with laser power less than 204 mW

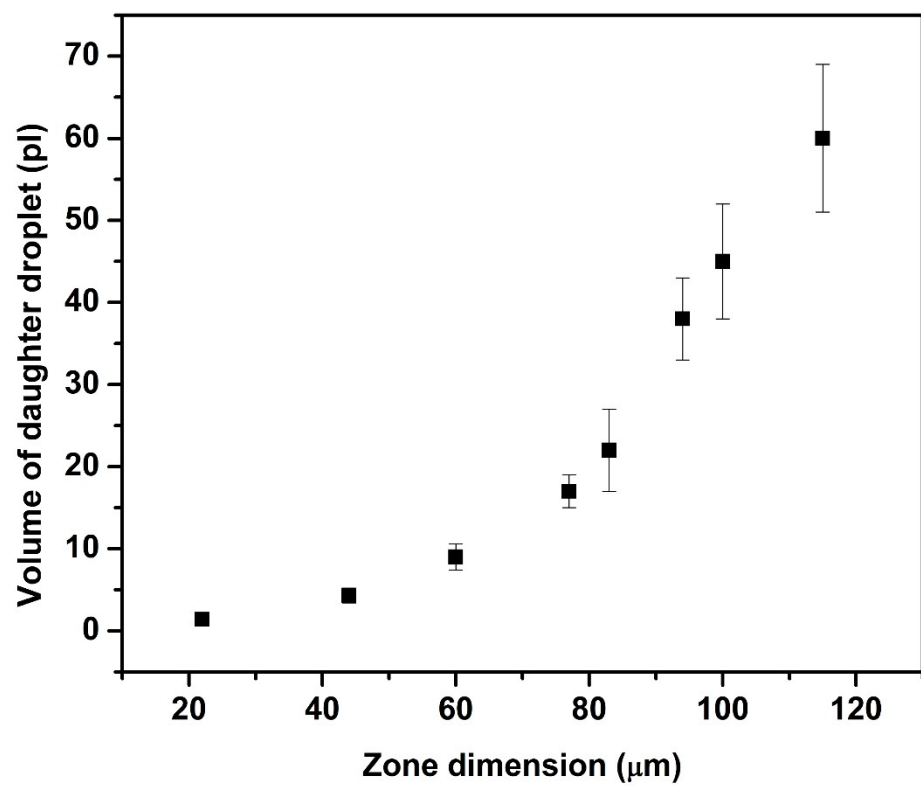

**Fig. S4.** Volume of the daughter droplet in various hydrophilic zones

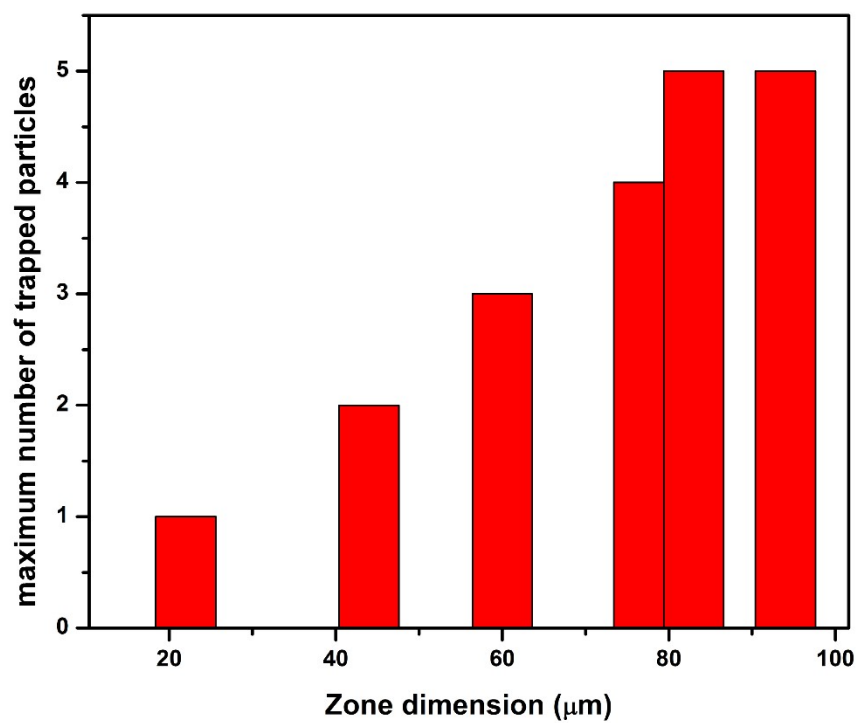

**Fig. S5.** The maximum number of particles trapped in the different hydrophilic zone dimension

**Table S1.**Raman peak assignment of Polystyrene bead

| <b>Raman peak of Polystyrene bead (cm<sup>-1</sup>)</b> | <b>Assignment</b>                                                    |
|---------------------------------------------------------|----------------------------------------------------------------------|
| 613                                                     | Radial ring deformation of C-C-C                                     |
| 751                                                     | Out of plane deformation of C-H                                      |
| 788                                                     | Radial ring deformation of C-C-C                                     |
| 833                                                     | Out of plane deformation of C-H                                      |
| 896                                                     | Out of plane deformation of C-H                                      |
| 993                                                     | stretching of C-C                                                    |
| 1022                                                    | in-plane bending of C-H                                              |
| 1149                                                    | in-plane bending of C-H                                              |
| 1175                                                    | in-plane bending of C-H                                              |
| 1195                                                    | in-plane bending of C-H                                              |
| 1324                                                    | out-of -plane ring deformation of C-C-C, out-of-plane bending of C-H |
| 1445                                                    | stretching of C-C                                                    |
| 1575                                                    | stretching of C-C                                                    |
| 1596                                                    | stretching of C-C                                                    |

**Table S2.** Raman peak assignment of yeast cell

| <b>Raman peak of Yeast cell (cm<sup>-1</sup>)</b> | <b>Assignment</b>                                                          |
|---------------------------------------------------|----------------------------------------------------------------------------|
| 595                                               | cytochrome <i>c</i>                                                        |
| 637                                               | tyrosine                                                                   |
| 662                                               | thymine                                                                    |
| 750                                               | cytochrome <i>c</i> and <i>b</i>                                           |
| 778                                               | cytosine, thymine                                                          |
| 802                                               | RNA phosphate backbone                                                     |
| 834                                               | phenylalanine                                                              |
| 902                                               | rocking CH <sub>2</sub>                                                    |
| 966, 996                                          | cytochrome <i>c</i> and <i>b</i>                                           |
| 1024                                              | phenylalanine                                                              |
| 1064, 1072                                        | saturated compounds (C-C)                                                  |
| 1120, 1144, 1167                                  | cytochrome <i>c</i> and <i>b</i>                                           |
| 1199                                              | phenylalanine, tyrosine                                                    |
| 1240                                              | saccharides, amino acids,<br>nucleotides                                   |
| 1293                                              | twisting CH <sub>2</sub> ; cytochrome <i>c</i> and<br><i>b</i> ; amide III |
| 1308, 1338                                        | cytochrome <i>c</i> and <i>b</i>                                           |
| 1446                                              | scissoring CH <sub>2</sub> , umbrella CH <sub>3</sub><br>modes             |
| 1596                                              | cytochrome <i>c</i> and <i>b</i> :<br>phenylalanine                        |
| 1651                                              | amide I (1650 cm <sup>-1</sup> ) and other<br>C = O, C = C                 |
| 1733                                              | C = O                                                                      |



**Table S3.** Raman peak assignment of Human mononuclear cell

| <b>Raman peak of MNC (cm<sup>-1</sup>)</b> | <b>Assignment</b>                                                        |
|--------------------------------------------|--------------------------------------------------------------------------|
| 785                                        | C/U nucleic acids                                                        |
| 826                                        | O-P-O marker for RNA in A-form structure                                 |
| 1094                                       | $PO_2^-$ nucleic acids                                                   |
| 1153                                       | Ribose and weak nucleic acid base vibrations                             |
| 1221                                       | Protein, Phenylalanine, Tyrosine                                         |
| 1343                                       | A/G nucleic acids                                                        |
| 1374                                       | Cytochrome C                                                             |
| 1446                                       | Lipids/phospholipids, Protein CH <sub>2</sub> CH <sub>3</sub> stretching |
| 1521                                       | Protein Amide II –N-H bending and C-N stretching, Tyrosine               |
| 1578                                       | Cytochrome C. A and G in nucleic acids, Possible Arginine band           |
| 1657                                       | Protein Amide I $\alpha$ -helix/ $\beta$ -turn. Lipid $\nu$ (C=C)        |
